# **Translational predictions of phase 2a first-in-patient efficacy studies for antituberculosis drugs**

Authors: Jacqueline P. Ernest<sup>1†</sup>, Janice Jia Ni Goh<sup>1†</sup>, Natasha Strydom<sup>1†</sup>, Qianwen Wang<sup>1†</sup>, Rob C. van Wijk<sup>1†</sup>, Nan Zhang<sup>1†</sup>, Amelia Deitchman<sup>1</sup>, Eric Nuermberger<sup>2</sup>, Rada M. Savic<sup>1\*</sup>

## **Affiliation:**

<sup>1</sup>Department of Bioengineering and Therapeutic Sciences, University of California, San Francisco, San Francisco, California, United States of America

<sup>2</sup>Center for Tuberculosis Research, Department of Medicine, Johns Hopkins University School of Medicine, Baltimore, Maryland, United States of America

<sup>†</sup>Shared authorship ordered alphabetically

\*Corresponding author, E-mail address: [rada.savic@ucsf.edu](mailto:rada.savic@ucsf.edu)

## **Address:**

1700 4th St, Rm 503C

University of California, San Francisco Box 2552

San Francisco, CA 94158, United States

**Telephone number:** +1 415 502-0640

**E-mail address:** [rada.savic@ucsf.edu](mailto:rada.savic@ucsf.edu)

**Running title:** Translational pharmacology platform to predict EBA (50/70 characters)

**Word count:** 2,566

## Abstract

**Background:** Phase 2a trials in tuberculosis typically use early bactericidal activity (EBA), the decline in sputum colony forming units (CFU) over 14 days, as the primary outcome for testing the efficacy of drugs as monotherapy. However, the cost of phase 2a trials can range from 7 to 19.6 million dollars on average, while more than 30% of drugs fail to progress to phase 3. Better utilizing preclinical data to predict and prioritize the most likely drugs to succeed will thus help accelerate drug development and reduce costs. We aim to predict clinical EBA using preclinical in vivo pharmacokinetic-pharmacodynamic (PKPD) data and a model-based translational pharmacology approach.

**Methods and Findings:** First, mouse PK, PD and clinical PK models were compiled. Second, mouse PKPD models were built to derive an exposure response relationship. Third, translational prediction of clinical EBA studies was performed using mouse PKPD relationships and informed by clinical PK models and species-specific protein binding. Presence or absence of clinical efficacy was accurately predicted from the mouse model. Predicted daily decreases of CFU in the first 2 days of treatment and between day 2 and day 14 were consistent with clinical observations.

**Conclusion:** This platform provides an innovative solution to inform or even replace phase 2a EBA trials, to bridge the gap between mouse efficacy studies and phase 2b and phase 3 trials, and to substantially accelerate drug development.

# 1 Introduction

2 *Mycobacterium tuberculosis* remains one of the deadliest infectious agents globally.  
3 Tuberculosis (TB) drug discovery and development activity has increased emphasis on shorter,  
4 more universal regimens to treat all TB cases independent of resistance status<sup>1,2</sup>. However, with  
5 an increasing number of new drugs and limited resources for clinical trials, further innovation of  
6 drug development is imperative to identify effective drugs and regimens more efficiently and with  
7 higher confidence<sup>1-3</sup>. A phase 2a early bactericidal activity (EBA) study is typically the first  
8 clinical evaluation of novel anti-TB drug efficacy with the primary purpose of detecting the  
9 presence and magnitude of EBA and informing possible dose-response relationships<sup>4</sup>. However,  
10 the cost of phase 2a trials can range from 7 to 19.6 million dollars on average, while more than  
11 30% of drugs fail to progress to phase 3<sup>5</sup>. This highlights the challenges inherent in translating  
12 results in preclinical models into successful clinical outcomes. Traditional translation of findings  
13 from preclinical *in vivo* models, by pharmacokinetic modeling and allometric scaling to identify  
14 the dosing regimen in humans that best matches the efficacious drug exposure in animals, is  
15 insufficient. Mechanistic mouse-to-human pharmacokinetic-pharmacodynamic (PKPD) models  
16 that describe the bacterial kill and PKPD relationships are better at predicting clinical results,  
17 including the results of late-stage trials<sup>6-8</sup>. Therefore, our objective is to establish a relevant and  
18 robust model-based translational platform that can reliably link preclinical to clinical drug  
19 development and predict early efficacy trials for anti-TB drugs across different compound classes  
20 (Figure 1). We compiled a comprehensive preclinical and clinical database of PK, PD, and baseline  
21 bacterial growth data for nine drugs. The drugs used to develop and validate our proposed platform

22 were rifampin (RIF), isoniazid (INH), pyrazinamide (PZA), rifapentine (RPT), bedaquiline (BDQ),  
23 delamanid (DLM), pretomanid (PMD), moxifloxacin (MXF) and linezolid (LZD).

24 The translational platform in the present study intends to increase the accuracy of  
25 preclinical to clinical translation by enabling quantitative prediction of clinical studies from  
26 preclinical outputs and serves as a foundation for model-informed TB drug discovery and  
27 development.

28

## 29 **Methods**

### 30 **Drug dataset for model building and validation**

31 To build our model and evaluate its predictive accuracy for clinical EBA, nine first- and  
32 second-line anti-TB drugs (BDQ, DLM, INH, LZD, MXF, PMD, PZA, RIF, RPT) were selected  
33 for which mouse PK, mouse PD, human population PK models and human clinical EBA data were  
34 available.

### 35 **Data required to assess preclinical drug efficacy**

36 A large database of PK and PD data in mice was collected (Figure 2, Table S1). PK  
37 experiments in BALB/c mice were dose-ranging (2-10 dose levels), single or multiple oral dosing  
38 for up to 8 weeks, with 29-238 observations of plasma concentration per drug. PD experiments in  
39 BALB/c mice infected through aerosol delivery were dose-ranging (2-15 dose levels) with  
40 treatment durations of 21-70 days, and 55-252 observations of lung CFU counts per drug. Most  
41 experiments were performed at Johns Hopkins University (Table S1). Lung CFU counts were  
42 measured by plating lung homogenates at designated time points. In case of murine data showing  
43 unexpected trends such as a double peak per oral dose in a PK profile e.g. DLM mouse PK (Figure  
44 2a), data accuracy was confirmed in collaboration with experimentalists.

### 45 **Mouse PKPD model development**

46 An integrated mouse PKPD model was developed for each drug. PK data were described  
47 using one- or two-compartment models with first order absorption with or without delay, and  
48 saturable elimination when necessary. The bacterial growth dynamics without treatment was  
49 described using our previously published baseline model (Eq. S1)<sup>9</sup>. The baseline model captures  
50 the decreased rate of growth over time and attributes the decline to time- and bacteria-dependent  
51 immune control over the infection. The drug effect, measured as the log<sub>10</sub> CFU drop independent

52 of the immune effect over time, was incorporated using a sigmoidal Emax relationship (Eq. S2).  
53 A delay effect (Kd) was included to mouse PKPD models to establish an indirect relationship  
54 between plasma drug concentrations and drug effect at the site of action (Eq. S3 & S4). Detailed  
55 model development and model diagnostics can be found in supplemental materials.

## 56 **Prediction of the outcomes for clinical EBA studies**

57 The PKPD relationship quantified in mice was used to predict the clinical EBA. Drug  
58 concentrations in humans were simulated based on clinical population pharmacokinetic models  
59 (Table S1) to drive the concentration-effect relationship in the clinical predictions. Where clinical  
60 population PK models were unavailable, allometric scaling from mouse PK was used<sup>10</sup>. Protein  
61 binding ratios between humans and mice ( $f_{u\frac{humans}{mice}}$ ) were used to convert unbound plasma drug  
62 concentrations from human to mouse to translate the mouse PKPD relationships (Table S1)<sup>11-17</sup>.

63 Clinical predictions for 9 drugs were simulated, with 14 unique studies at several dose  
64 levels were used for validation. Predictions were done by simulating CFU decline in 1000 virtual  
65 patients treated with the same dose as reported in the clinical EBA study. The baseline (Day 0)  
66 sputum values used were derived from the mean value for each arm reported in each study, and  
67 the variability in baseline bacterial burden between individuals used was the baseline variance  
68 among all clinical studies. The net growth and death of bacteria without treatment was assumed to  
69 be zero (Eq. S5). Predictions were reported as the mean and standard deviation of the predicted  
70 time course of CFU decline. For drugs where observed data were available, the data were  
71 overlaid for visual inspection. Finally, quantitative predictions of commonly reported parameters  
72 (change from baseline to Day 2 and from Day 2 to Day 14) were compared to the observed at  
73 various dose levels along a line of unity.

## 74 **Software and Statistical method**

75           Preclinical and clinical PKPD modelling was performed in NONMEM (7.4.3) through PsN  
76 (4.8.1.). For LZD preclinical PK, Monolix (5.0.0) was used. Models were developed following  
77 numerical and graphical diagnostics, assessing drop in objective function value through the  
78 likelihood ratio test and parameter precision, as well as goodness-of-fit plots and visual predictive  
79 checks, respectively, in addition to pharmacological relevance. Data transformation and graphical  
80 output were performed in R (4.1.3) through the RStudio (2022.02.3) interface using the xpose4  
81 and tidyverse packages.

82

## 83 **Results**

### 84 **Large preclinical and clinical PK and PD database of nine TB drugs**

85 We collated a rich longitudinal dataset of mouse PK (plasma concentrations, 1146 data  
86 points) and PD data (lung CFU counts, 4042 data points), as well as human population PK models  
87 and human PD data (sputum CFU counts) (Table S1). PD experiments were done mostly in mouse  
88 infection models infected via aerosol with an inoculum size no less than  $3.5 \log_{10}$  CFU/ml and  
89 incubation periods of 13-17 days, prior to the start of treatment. Exceptions were LZD, which had  
90 an incubation period of 5 days, but had a similar inoculation size of larger than  $3.5 \log_{10}$  CFU/ml,  
91 and RPT which had an incubation period of 41 days but a lower inoculation size than  $3.5 \log_{10}$   
92 CFU/ml.

93 Human PK data were simulated using published models from literature (Table 1 and Figure  
94 2C). Human PD data with a total of 260 human sputum CFU datapoints originating from Phase 2a  
95 trials across 13 different studies ranging from 2 to 14 days were used to validate our Phase 2a EBA  
96 predictions.

97

### 98 **Preclinical PK and PKPD models adequately described mouse data**

99 The final PK and PKPD model parameter estimates are shown in Table 1. A 2-compartment  
100 model with saturated clearance described via the Michaelis Menten equation best described the  
101 mouse plasma concentration data for BDQ, INH, LZD, PMD, PZA and RIF. MXF was best  
102 described using a 2-compartment model with linear elimination, RPT by a 1-compartment model  
103 with saturated elimination, and DLM by a 1-compartment model with linear elimination. Visual  
104 predictive checks of the final model for both mouse PK and PKPD data showed good fits (Figures  
105 S1 & S2). The exposure-response relationships for each drug in mouse infection models are



106 summarized in Table 1 and Figure S4 and aligned with clinical knowledge of the efficacy of each  
107 drug.

108

### 109 **Clinical EBA was well predicted by translational platform**

110 The translational platform predicted clinical EBA in TB patients receiving monotherapy  
111 with the nine drugs as shown in Figure 3. Our predictions overlapped well with the observed data  
112 across multiple doses and timepoints for most of the drugs. BDQ and LZD had slight  
113 overpredictions at the later time, and RPT showed activity up to 5 days after a single dose, whereas  
114 our model predicted limited declines in CFU.

115 Agreement between predicted and observed quantitative change in CFU is shown in Figure  
116 4 as a correlation plot for EBA at time intervals of 0-2 days and 2-14 days. Most predictions for  
117 0-2 days fell within 0.25 log<sub>10</sub> CFU/ml/day of the observed EBA as indicated by the line of unity  
118 and corresponding dotted lines. Predictions for 2-14 days were even closer to observed. Predictions  
119 were overall consistent with the observed data in the clinical EBA studies for all nine drugs, except  
120 for RPT where activity was underpredicted.

121

122

## 123 Discussion

124 We established a mouse-to-human translational platform by integrating a bacterial  
125 dynamics model, mouse PKPD relationships, clinical PK and species-specific drug plasma protein  
126 binding and validated the platform with clinical EBA data (Figure 1). The changes in sputum CFU  
127 counts over the first two days and from Day 2 to Day 14 in TB patients receiving monotherapy  
128 with each of nine TB drugs in 13 clinical EBA studies were successfully predicted, except for RPT  
129 (Figure 3 and 4). Of the clinical EBA studies included in our analysis, the RPT EBA trial was the  
130 only one in which EBA was assessed for multiple days after a single dose. Our human population  
131 PK model indicated RPT was mostly cleared from the body two days after a single dose, but the  
132 trial results indicated RPT was still exerting an effect on bacterial load between two and five days  
133 post-dose. It is possible that RPT has a post-antibiotic effect that was not sufficiently captured by  
134 the model<sup>18</sup>. The model overpredicted the EBA of BDQ. However, in the model, the active  
135 metabolite, BDQ-M2, was not considered. In mice, M2 is estimated to contribute approximately  
136 50 percent of the drug effect. One possible reason for the overprediction are the parent-to-  
137 metabolite ratios between species differ. Future studies can account for these differences.

138 Murine TB models are routinely and often exclusively used as *in vivo* efficacy models in  
139 preclinical TB drug development<sup>19</sup>. As the inoculum size and incubation period for bacterial  
140 infection in the lung prior to treatment can affect drug response<sup>9</sup>, we standardized our inclusion  
141 criteria to experiments using the most common design with the incubation duration of 13-17 days  
142 and inoculum size to larger than 3.5 log<sub>10</sub> CFU/ml. Incubation durations outside this range were  
143 considered only when data were otherwise not available, which was the case for LZD and RPT.

144

145 A key component to our model accuracy is the addition of the bacterial dynamics model.  
146 Mouse and human immune activation against TB infection differ significantly, therefore the  
147 underlying baseline of bacterial dynamics will differ. Subtracting the mouse immune effect on  
148 bacterial decline more accurately estimates the drug contribution to CFU decline. Without such  
149 consideration, the clinical CFU decline is overpredicted (Figure S3). Despite inherent differences  
150 between species in terms of drug PK, sampling (whole lung homogenate versus sputum), and  
151 infecting bacterial strain, the relationship between drug effect on bacteria and the concentration to  
152 achieve the effect appear, based on this analysis, to be portable between mice and patients. In  
153 addition, although the mouse strain used in the studies (BALB/c) models intracellular bacteria but  
154 not extracellular bacteria in caseous lesions<sup>20</sup>, the PKPD relationships observed in this model,  
155 when derived in comparison to the baseline bacterial dynamics, appear to accurately reflect those  
156 observed in EBA studies. Other approaches or more information may be needed to fully account  
157 for drug exposures at the site of infection in cavities or other caseous lesions or any PK/PD  
158 relationships unique to those microenvironments.<sup>3,21,22</sup>

159 Clinical EBA was predicted well across 14 studies spanning more than two decades.  
160 Compared to the participants enrolled in more recent EBA studies (2007 to 2015)<sup>23-29</sup> at the same  
161 site, the participants enrolled between 1992 and 2005<sup>30-34</sup> had more severe disease and therefore  
162 higher baseline CFU counts in their sputum samples (mean baseline: 6.9 log<sub>10</sub> CFU per mL).  
163 However, the predictive accuracy of our model was robust despite this large variation in baseline  
164 bacterial burden. For example, RIF had a good overlap of predicted and observed EBA (Figure 3)  
165 despite the study being conducted in 2015 with the lowest median baseline of 4.58 log<sub>10</sub> CFU per  
166 mL<sup>24</sup>.

167

168 Clinical EBA studies are the only acceptable way to evaluate a drug as monotherapy in TB  
169 patients despite their limitations on predicting long-term efficacy. In addition to detecting the  
170 presence of an EBA response, the trial can inform on the dose-response curve (e.g., INH and RIF),  
171 which could be used in dose selection for future trials<sup>22,24,35</sup>. We have shown here that our  
172 translational platform can adequately predict these outcomes. With limited resources, this costly  
173 clinical study can be designed more efficiently or avoided altogether by using our approach to  
174 predict a reliable result regarding clinical dose-response effects, and to provide useful information  
175 about dose and/or drug candidate selection for further clinical development. This scenario is well  
176 exemplified by the nitroimidazole, PMD. PMD has a dose response at doses up to 192 mg/kg in  
177 mice which, following the conventional allometric scaling method, approximates 1500 mg in  
178 humans. However, such translation is problematic as the clinical observations from two human  
179 EBA trials demonstrated no dose response above 200 mg in human EBA. Using our translational  
180 platform, we found that the drug effect of PMD reaches plateau after 200 mg which is consistent  
181 with clinical observations (Figure S4). Therefore, our translational platform could serve as a  
182 powerful tool for, but not limited to, better dose selection for clinical trials design. By better  
183 informing dose selection, the translational modeling platform may reduce the time and effort spent  
184 in early clinical development, and therefore, accelerate progress to trials that are more informative  
185 of long-term outcomes.

186 Building on our translational framework, efficacy of combination regimens of TB drugs  
187 tested preclinically can be predicted in future work. This shows the principles of how preclinical  
188 data used in a model-based translational framework can inform the design of clinical late-stage  
189 efficacy studies, such as phase 2b studies. Future goals to improve the platform include  
190 characterizing PKPD relationships of combination regimens by accounting for PKPD drug-drug

191 interactions, as well as characterizing lesion-specific PKPD relationships. Clinical TB disease (e.g.,  
192 caseation necrosis and cavitation) will be represented in the translational platform to include  
193 infection and efficacy data in animal models of TB with more human-like necrotic lesions, such  
194 as C3HeB/FeJ mice and New Zealand white rabbits<sup>21</sup>. Our translational platform may then be able  
195 to predict late-stage trials of combination regimens. If so, our platform could reduce dependence  
196 on phase 2a efficacy studies by predicting EBA and also directly inform the design of phase 2b  
197 and phase 3 studies to assist clinical anti-TB regimen development.

198 In summary, we established a foundation for translating the results from mouse efficacy  
199 models to clinical EBA studies through establishing quantitative relationships involving mouse  
200 PK and PD, as well as drug dose response *in vivo*. In the future, our platform will be expanded to  
201 include combination regimens and longer durations of treatment by accounting for PKPD drug-  
202 drug interactions, and necrotic lesion penetration. This platform is an innovation to accelerate TB  
203 drug development and a good example of model-informed drug discovery and development.

204

## 205 **Acknowledgements**

206 We acknowledge Kelly Dooley for insightful discussions, and TB Alliance for support and  
207 generously sharing the in-house data of anti-TB drugs linezolid and pretomanid. This work was  
208 supported by NIH Grant R01 AI-111992.

209 **Author contributions:** The manuscript was written by JE, JG, NS, QW, RW, and NZ and  
210 commented on by all authors. JE, JG, NS, QW, RW, and NZ contributed to data collection, model  
211 development, data and model management, and code review. Contributions to data collection and  
212 model development were as follows, JE: BDQ and RPT; NS: LZD; QW: DLM, PMD, and MXF;  
213 NZ: PZA, RIF, and INH. JG and RW revised the manuscript, including generation of figures and  
214 tables, and carried out code review for all drugs. AD worked on data collection, human PK model  
215 development, simulation, and preliminary model development. EN provided preclinical data used  
216 in our current study, provided substantial scientific context, and edited the manuscript. RS  
217 supervised the whole research.

218

219

220 **Figures:**

221

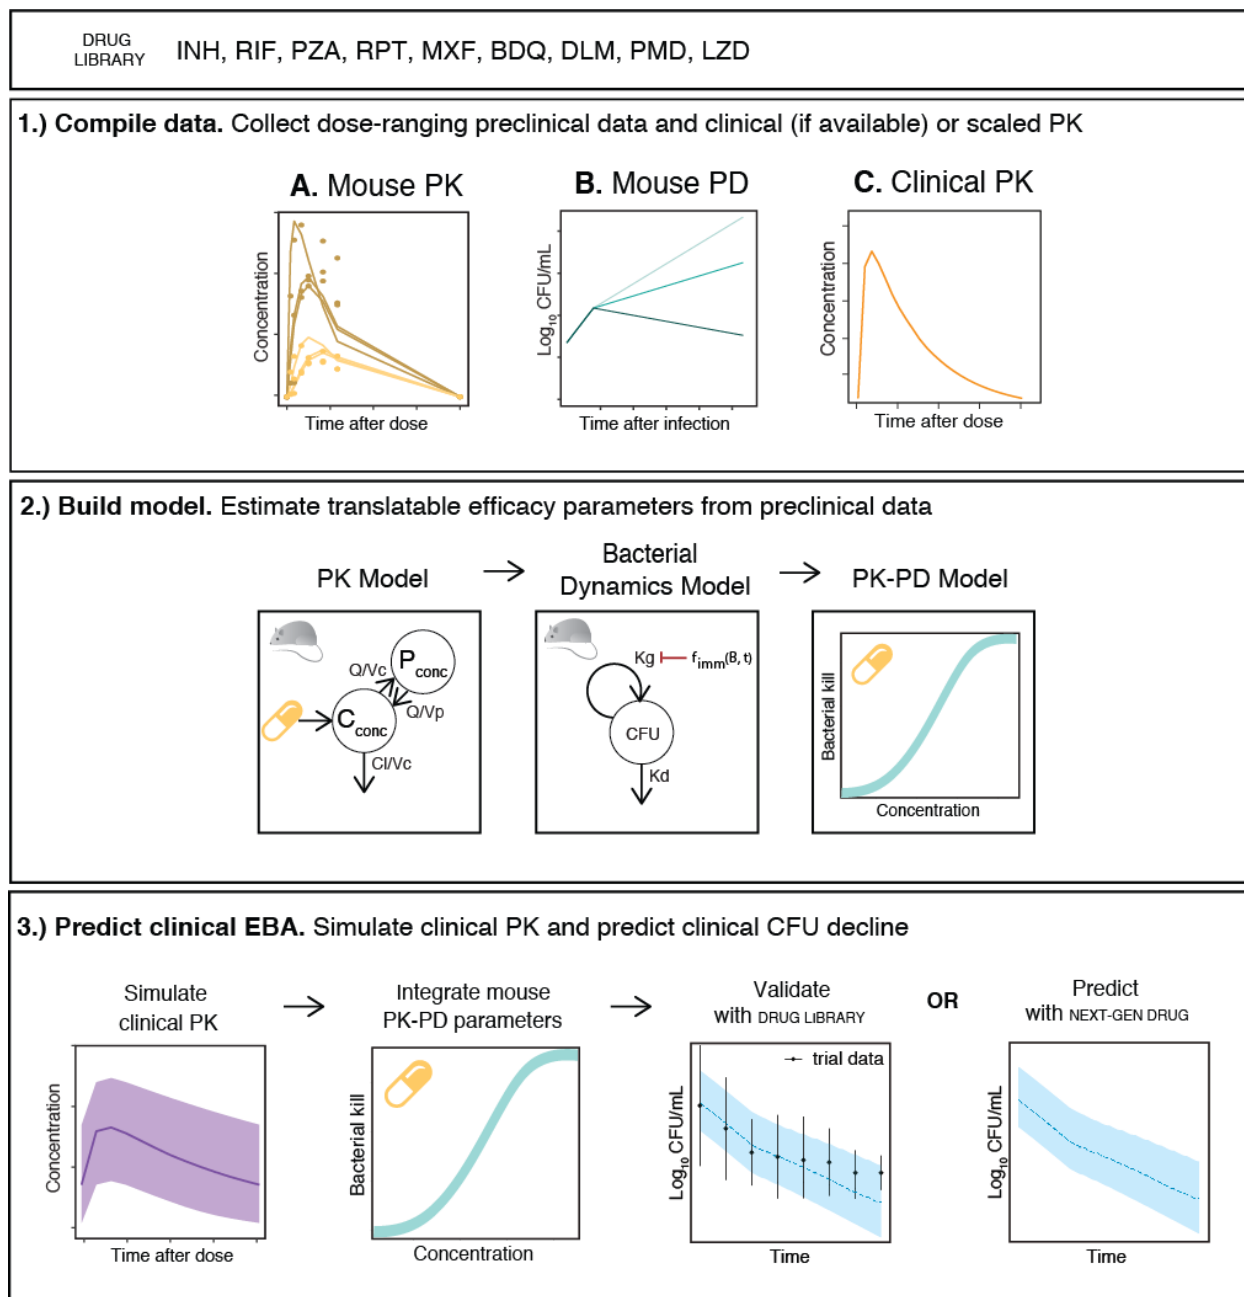

222

223 **Figure 1. The translational pharmacology approach to predicting early bactericidal activity**

224 **in patients.** Components necessary for translation include mouse PKPD and clinical PK (actual

225 or scaled). The estimated relationship between drug concentration and bacterial kill is assumed to

226 be portable after correction for protein binding and integrated with clinical PK. Using baseline

227 bacterial burden from previous EBA trials as initial conditions, the early bactericidal activity is  
228 simulated with the translational model.

229

230



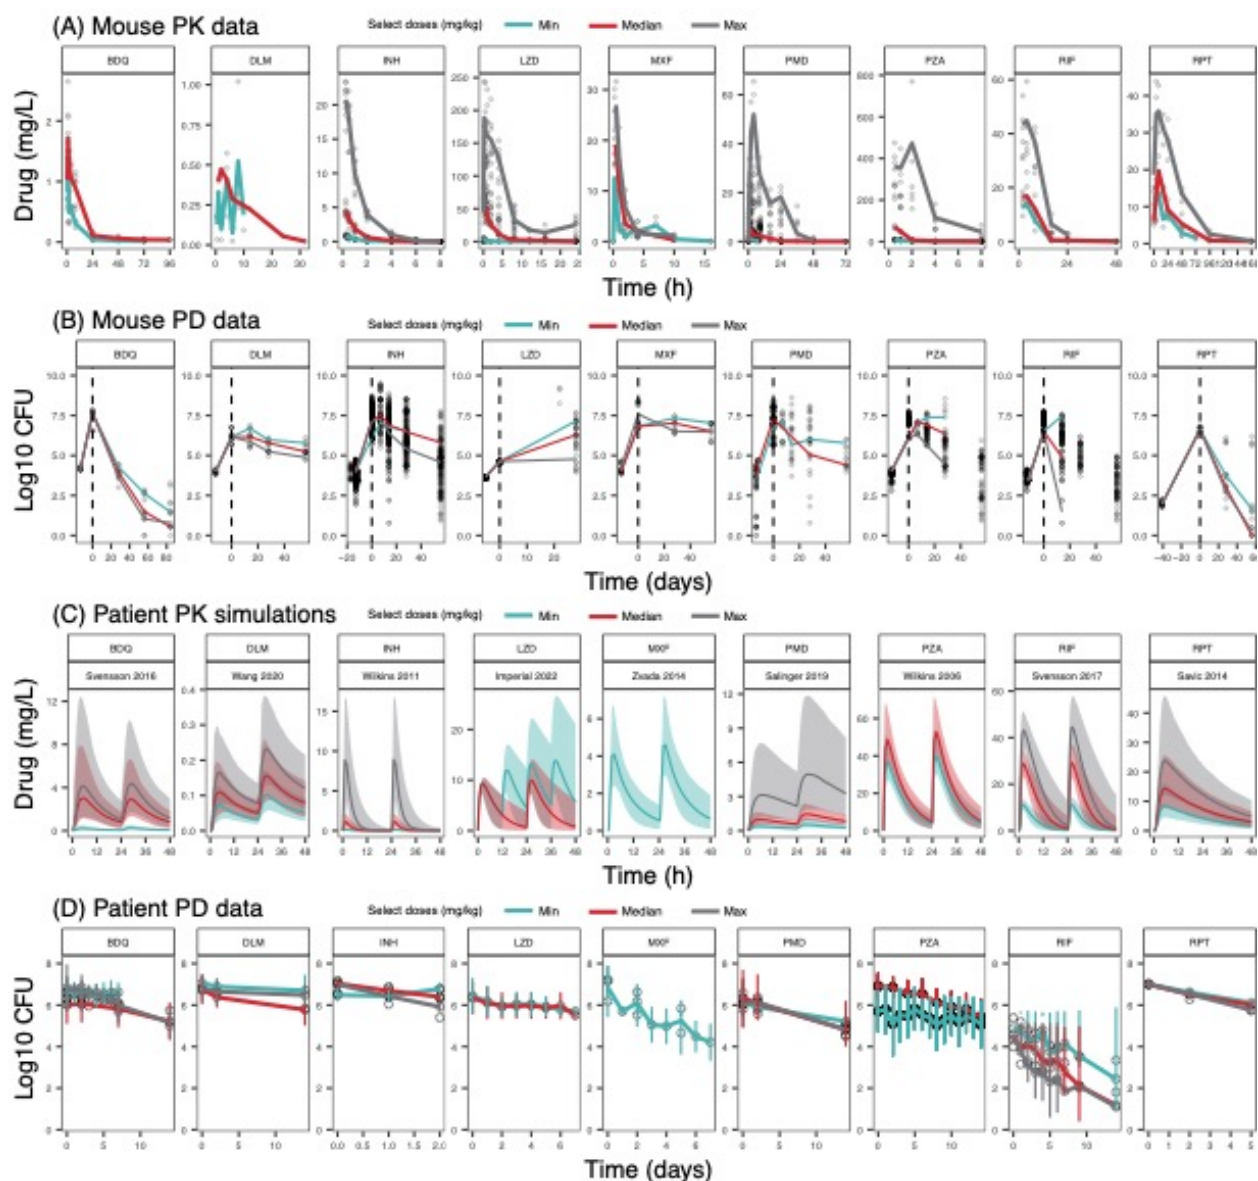

231  
 232 **Figure 2. A rich dataset of mouse and human PK and PD data for 9 first- and second-**  
 233 **line TB drugs was compiled for model building.** Only minimum, median and maximum doses  
 234 are represented as median lines when multiple doses were present. Data points for all doses are  
 235 plotted. Information on all doses is present in Table 1.

236 (A) Mouse pharmacokinetic (PK) data presented for the following doses: BDQ 12.5, 25  
 237 mg/kg; DLM 2.5, 3 mg/kg; INH 1.56, 6.25, 25 mg/kg; LZD 5, 100, 500 mg/kg; MXF  
 238 100, 200, 400 mg/kg, PMD 6, 28.8, 486 mg/kg; PZA 7, 100, 900 mg/kg; RIF 10, 15, 40  
 239 mg/kg; RPT 5, 10, 20 mg/kg. All doses were given once daily unless otherwise stated.

240 (B) Mouse pharmacodynamic (PD) data presented for the following doses: BDQ 12.5, 25, 50  
241 mg/kg; DLM 3, 10, 100 mg/kg; INH 0.1, 6.25, 100 mg/kg; LZD 100, 300, 1000 mg/kg;  
242 MXF 25, 50, 100 mg/kg; PMD 6.25, 30, 600 mg/kg; PZA 3, 50, 900 mg/kg; RIF 2.5, 40,  
243 640 mg/kg; RPT 5, 10, 20 mg/kg. All doses were given once daily, 5 days a week, unless  
244 otherwise stated.

245 (C) Human PK simulations from validated population PK models presented for the following  
246 doses: BDQ 25, 200, 400 mg; DLM 100, 200, 400 mg; INH 9, 75, 600 mg; LZD 600 mg  
247 once daily, 600 mg twice daily; MXF 400 mg; PMD 50, 200, 1200 mg; PZA 2000 mg;  
248 RIF 600, 1350, 1950 mg; RPT 300, 600, 1200 mg. All doses were given once daily,  
249 unless otherwise stated.

250 (D) Human Phase 2a early bactericidal activity study data presented for the following doses:  
251 BDQ 25, 200, 400 mg; DLM 100, 200, 400 mg; INH 9, 75, 600 mg; LZD 600 mg once  
252 daily, 600 mg twice daily; MXF 400 mg; PMD 50, 200, 1200 mg; PZA 200 mg; RIF  
253 600, 1350, 1950 mg; RPT 300, 600, 900, 1200 mg. All doses were given once daily,  
254 unless otherwise stated.

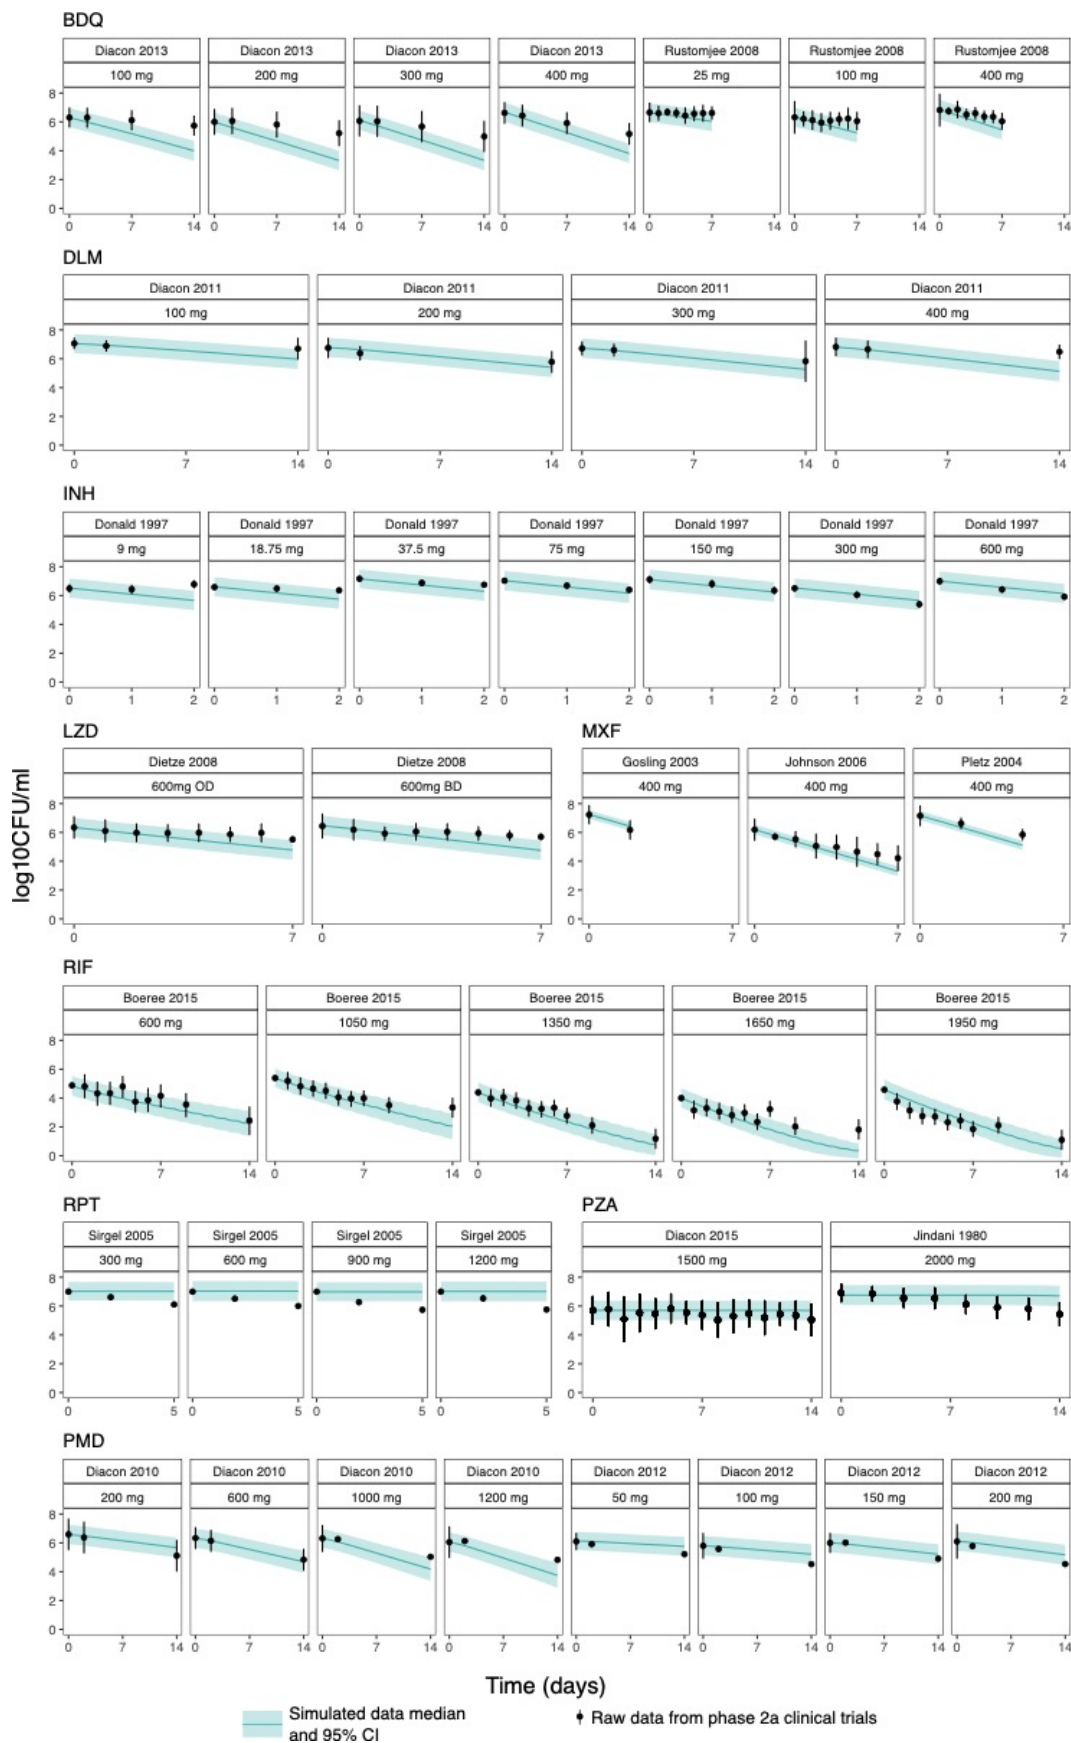

256

257

258 **Figure 3. Translational (mouse to human) PKPD model predicts clinical EBA trial**

259 **results well.** Medians and 95% confidence intervals of 1000 simulations from the translational

260 model overlap with observed EBA data from clinical trials.

261

262

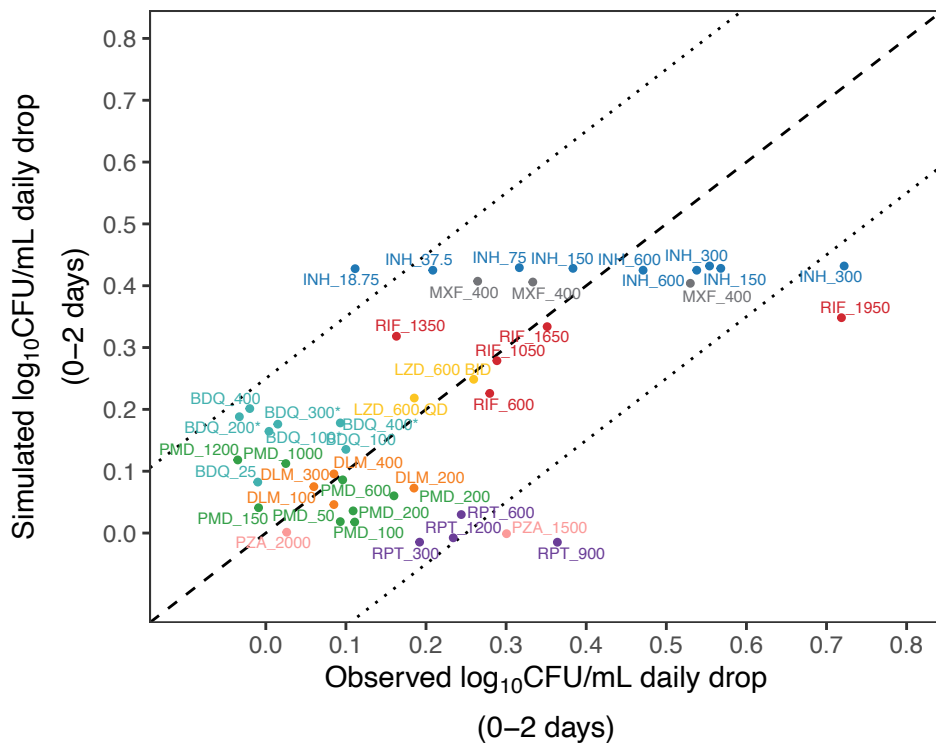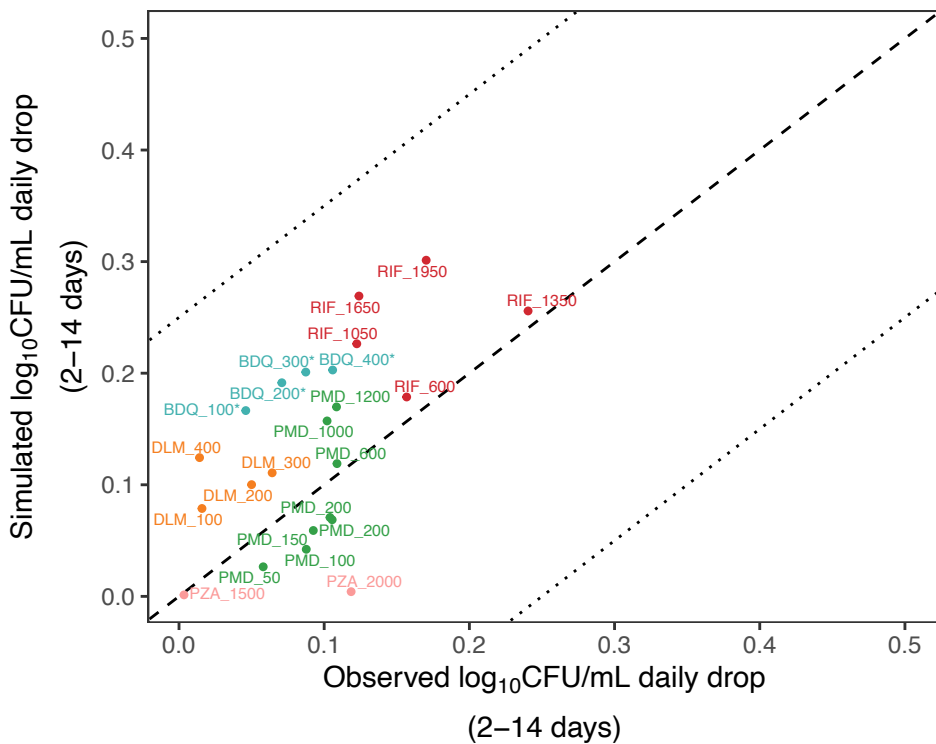

263

264

265

266

267 **Figure 4. Model-based prediction of daily change in  $\log_{10}$  CFU/mL correlates well with**  
268 **clinically observed daily change in  $\log_{10}$  CFU/mL for nine TB drugs at multiple dose levels**  
269 **of monotherapy between Day 0 to 2 (top) and Day 2 to 14 (bottom).** For some drugs, Day 14  
270 data were not available. Line of unity (dashed line)  $\pm$  0.25 (dotted lines). BDQ = bedaquiline, DLM  
271 = delamanid, INH = isoniazid, LZD = linezolid, MXF = moxifloxacin, PMD = pretomanid, PZA  
272 = pyrazinamide, RIF = rifampin, RPT = rifapentine. \*regimen contained a loading dose

273

**Table 1. Parameter estimates of final PK and PKPD models for nine TB drugs in mouse studies**

**Table 1.1 Mouse PK parameters**

| Drugs                                            | BDQ                               | DLM                               | INH                               | LZD                           | MXF                           | PMD                                   | PZA                                                    | RIF                               | RPT                                   |
|--------------------------------------------------|-----------------------------------|-----------------------------------|-----------------------------------|-------------------------------|-------------------------------|---------------------------------------|--------------------------------------------------------|-----------------------------------|---------------------------------------|
| PK Model                                         | 2 cmt                             | 1 cmt                             | 2 cmt,<br>non-linear<br>elim      | 2 cmt,<br>non-linear<br>elim  | 2 cmt                         | 2 cmt, non-<br>linear elim,           | 2 cmt,<br>non-linear elim                              | 2 cmt,<br>non-linear<br>elim      | 1 cmt,<br>non-linear<br>elim          |
| PK Model<br>Parameters                           | Ka = 3.24 (15.1%) h <sup>-1</sup> | Ka=0.446 h <sup>-1</sup><br>(25%) | CL <sub>IN</sub> =29.5 (7%) mL/hr | ka = 10 h <sup>-1</sup> FIX   | Ka=4.51 h <sup>-1</sup> (14%) | CL <sub>int</sub> =0.0161 L/h<br>(8%) | CL <sub>IN</sub> =14.4 (12%) ug/hr                     | V <sub>max</sub> =15.2 (6%) ug/hr |                                       |
|                                                  | CL = 0.0243 (5.9%) L/h            |                                   | K <sub>m</sub> =22.3 (19%) ug/mL  | CL <sub>int</sub> =0.0526 L/h | Q=0.148 L/h<br>(40%)          | Vc = 0.0578 L (11%)                   | K <sub>m</sub> =82.9 (61%) ug/mL                       | K <sub>m</sub> =1.16 (20%) ug/mL  |                                       |
|                                                  | Vc = 0.24 (11.4%) L               | CL = 0.0092 L/h<br>(8%)           | K <sub>a</sub> =8.23 (30%) 1/hr   | Vc = 0.0178 L                 | Vc = 0.116 L<br>(35%)         | Vp =0.0697 L (23%)                    | K <sub>a</sub> = 100 FIX 1/hr                          | K <sub>a</sub> =0.272 (10%) 1/hr  | ka = 0.894 (31%) h <sup>-1</sup>      |
|                                                  | Vp = 0.822 (29.3%) L              |                                   | V <sub>1</sub> =19.7 (21%) mL     | Vp =0.00836 L                 | Vp = 0.454 L<br>(23%)         | Q = 0.129 L/h (12%)                   | V <sub>1</sub> =13.3 (49%) mL                          | V <sub>1</sub> =3.39 (12%) mL     | V = 0.0139 (6%) L                     |
|                                                  | Q = 0.0127 (11.5%) L/h            | V2=0.0747 L<br>(1%)               | Q =11.3 (46%) mL/hr               | Q = 0.00175 L/h               | Vp = 0.454 L<br>(23%)         | KM = 9.85 mg/L<br>(18%)               | Q=3.11 (19%) mL/hr                                     | V <sub>2</sub> =27.4 (39%) mL     | K <sub>m</sub> = 75.8 (31%) ug/mL     |
|                                                  |                                   |                                   | V <sub>2</sub> =8.81 (26%) mL     | KM = 8.03 mg/L                | CL=0.164 L/h<br>(14 %)        | F <sub>DIF</sub> =1 FIX               | V <sub>2</sub> =10.9 (37%) mL                          | F <sub>10 mg/kg</sub> =1 FIX      | V <sub>max</sub> = 0.0333 (24%) ug/hr |
|                                                  |                                   |                                   |                                   |                               |                               | Dose=182 mg/kg FIX                    | F <sub>17 mg/kg</sub> = 1 FIX                          | F <sub>15 mg/kg</sub> =0.743 (0%) |                                       |
|                                                  |                                   |                                   |                                   |                               |                               | Y=1 FIX                               | ED <sub>50</sub> = 18.2 (23%) mg*kg <sup>-1</sup>      | F <sub>20 mg/kg</sub> =0.845 (1%) |                                       |
|                                                  |                                   |                                   |                                   |                               |                               |                                       | F <sub>max</sub> = 0.574 (34%)                         | F <sub>40 mg/kg</sub> =0.493 (2%) |                                       |
| Protein binding(f <sub>u</sub> ,<br>Human/Mouse) | 1.0 <sup>36</sup>                 | 1.0 <sup>37</sup>                 | 1.455 <sup>38,39</sup>            | 0.986 <sup>14,40</sup>        | 0.797 <sup>41</sup>           | 0.71 <sup>38,42</sup>                 | 0.925 <sup>43</sup> (mouse<br>data JHU<br>unpublished) | 4.545 <sup>39,44</sup>            | 0.422 <sup>45,46</sup>                |

**Table 1.2 Mouse PKPD parameters**

| Drug | PK/PD Model                | PK/PD Model Parameters                                                                                                                         | Model Type |
|------|----------------------------|------------------------------------------------------------------------------------------------------------------------------------------------|------------|
| BDQ  | Direct Emax Function       | Emax = 0.515 (1%) day <sup>-1</sup><br>EC <sub>50</sub> = 0.228 (5%) mg/L                                                                      | Subacute   |
| DLM  | Delayed Emax Function      | Emax = 0.51 (17%) day <sup>-1</sup><br>EC <sub>50</sub> = 0.187(25%) mg/L<br>K <sub>d</sub> = 5.92 (10%) day <sup>-1</sup>                     | Subacute   |
| INH  | Delayed Sigmoidal Function | Emax = 0.887 (10%) day <sup>-1</sup><br>EC <sub>50</sub> = 0.00399 (3%) mg/L<br>Y = 12.4 (90%)<br>K <sub>d</sub> = 7.75 (6%) day <sup>-1</sup> | Subacute   |
| LZD  | Delayed Sigmoidal Function | Emax = 1 day <sup>-1</sup> (FIX)<br>EC <sub>50</sub> = 2.77 (1%) mg/L<br>Y = 0.21 (3%)<br>K <sub>d</sub> = 6.75 (0%) day <sup>-1</sup>         | Acute      |



|     |                            |                                                                                                                                                 |          |
|-----|----------------------------|-------------------------------------------------------------------------------------------------------------------------------------------------|----------|
| MXF | Delayed Sigmoidal Function | $E_{max} = 0.589$ (12%) $\text{day}^{-1}$<br>$EC_{50} = 0.0029$ (55%) $\text{mg/L}$<br>$Y = 1$ FIX<br>$K_d = 0.0125$ (47%) $\text{day}^{-1}$    | Subacute |
| PMD | Delayed Emax Function      | $E_{max} = 0.636$ (5%) $\text{day}^{-1}$<br>$EC_{50} = 6.10$ (14%) $\text{mg/L}$<br>$K_d = 10.5$ (3%) $\text{day}^{-1}$                         | Subacute |
| PZA | Delayed Emax Function      | $E_{max} = 0.34$ (10%) $\text{day}^{-1}$<br>$EC_{50}$ (AUC) = 13.6 (42%) $\text{mg} \cdot \text{day/L}$<br>$K_d = 6380$ (16%) $\text{day}^{-1}$ | Subacute |
| RIF | Delayed Sigmoidal Function | $E_{max} = 0.678$ (16%) $\text{day}^{-1}$<br>$EC_{50} = 1.92$ (39%) $\text{mg/L}$<br>$Y = 1.38$ (24%)<br>$K_d = 1.34$ (79%) $\text{day}^{-1}$   | Subacute |
| RPT | Direct Sigmoidal Function  | $E_{max} = 0.299$ (1%) $\text{day}^{-1}$<br>$EC_{50} = 6.02$ (0%) $\text{mg/L}$<br>$Y = 2.36$ (7%)                                              | Chronic  |

-: data not available

# 1 **Supporting information**

## 2 **Supplemental Methods**

3 **Figure S1 Visual predictive checks for final mouse PK models at representative**  
4 **doses**

5 **Figure S2 Visual predictive checks for final mouse PD models at representative**  
6 **doses**

7 **Figure S3 Comparison between human plasma drug concentrations reached at**  
8 **clinical dose levels (light grey), upper limits of drug concentrations**  
9 **within safety ranges (dark grey) and concentration-response**  
10 **relationships for nine TB drugs**

11 **Figure S4 The immune component of the model-based translational platform is**  
12 **essential for accurate prediction of early bactericidal activity**

13 **Table S1 Mouse and human PK and PD database of nine TB drugs**

## References

1. Ginsberg, A. M. Tuberculosis drug development: progress, challenges, and the road ahead. *Tuberculosis* **90**, 162–167 (2010).
2. Ginsberg, A. M. Drugs in development for tuberculosis. *Drugs* **70**, 2201–2214 (2010).
3. Nuermberger, E. L. Preclinical Efficacy Testing of New Drug Candidates. *Microbiol Spectr* **5**, (2017).
4. Jindani, A., Aber, V. R., Edwards, E. A. & Mitchison, D. A. The early bactericidal activity of drugs in patients with pulmonary tuberculosis. *Am. Rev. Respir. Dis.* **121**, 939–949 (1980).
5. Van Norman, G. A. Phase II Trials in Drug Development and Adaptive Trial Design. *JACC Basic Transl Sci* **4**, 428–437 (2019).
6. Chen, C. *et al.* The multistate tuberculosis pharmacometric model: a semi-mechanistic pharmacokinetic-pharmacodynamic model for studying drug effects in an acute tuberculosis mouse model. *J. Pharmacokinet. Pharmacodyn.* **44**, 133–141 (2017).
7. Danhof, M. *et al.* Mechanism-Based Pharmacokinetic-Pharmacodynamic Modeling: Biophase Distribution, Receptor Theory, and Dynamical Systems Analysis. *Annu. Rev. Pharmacol. Toxicol.* **47**, 357–400 (2007).
8. Danhof, M., de Lange, E. C. M., Della Pasqua, O. E., Ploeger, B. A. & Voskuyl, R. A. Mechanism-based pharmacokinetic-pharmacodynamic (PK-PD) modeling in translational drug research. *Trends Pharmacol. Sci.* **29**, 186–191 (2008).
9. Zhang Nan *et al.* Mechanistic Modeling of Mycobacterium tuberculosis Infection in Murine Models for Drug and Vaccine Efficacy Studies. *Antimicrob. Agents Chemother.* **64**, e01727-19 (2020).

10. U.S. Department of Health and Human Services, Food and Drug Administration, Center for Drug Evaluation and Research (CDER). Guidance for Industry Estimating the Maximum Safe Starting Dose in Initial Clinical Trials for Therapeutics in Adult Healthy Volunteers. Preprint at <https://www.fda.gov/media/72309/download> (2005).
11. Svensson, E. M., Dosne, A.-G. & Karlsson, M. O. Population Pharmacokinetics of Bedaquiline and Metabolite M2 in Patients With Drug-Resistant Tuberculosis: The Effect of Time-Varying Weight and Albumin. *CPT Pharmacometrics Syst Pharmacol* **5**, 682–691 (2016).
12. Patterson, S. *et al.* The anti-tubercular drug delamanid as a potential oral treatment for visceral leishmaniasis. *Elife* **5**, (2016).
13. Alghamdi, W. A., Al-Shaer, M. H. & Peloquin, C. A. Protein Binding of First-Line Antituberculosis Drugs. *Antimicrob. Agents Chemother.* **62**, (2018).
14. Dryden, M. S. Linezolid pharmacokinetics and pharmacodynamics in clinical treatment. *J. Antimicrob. Chemother.* **66**, iv7–iv15 (2011).
15. Dorn, C. *et al.* Decreased protein binding of moxifloxacin in patients with sepsis? *GMS Infect Dis* **5**, Doc03 (2017).
16. Committee for Medicinal Products for Human Use (CHMP). Assessment report Pretomanid FGK International non-proprietary name: pretomanid. Preprint at [https://www.ema.europa.eu/en/documents/assessment-report/pretomanid-fgk-epar-public-assessment-report\\_en.pdf](https://www.ema.europa.eu/en/documents/assessment-report/pretomanid-fgk-epar-public-assessment-report_en.pdf) (2020).
17. Egelund, E. F. *et al.* Protein binding of rifapentine and its 25-desacetyl metabolite in patients with pulmonary tuberculosis. *Antimicrob. Agents Chemother.* **58**, 4904–4910 (2014).
18. Wicha, S. G. *et al.* Forecasting Clinical Dose-Response From Preclinical Studies in Tuberculosis Research: Translational Predictions With Rifampicin. *Clin. Pharmacol. Ther.* **104**, 1208–1218 (2018).

19. Singh, A. K. & Gupta, U. D. Animal models of tuberculosis: Lesson learnt. *Indian J. Med. Res.* **147**, 456–463 (2018).
20. Kramnik, I. & Beamer, G. Mouse models of human TB pathology: roles in the analysis of necrosis and the development of host-directed therapies. *Semin. Immunopathol.* **38**, 221–237 (2016).
21. Ernest, J. P. *et al.* Development of New Tuberculosis Drugs: Translation to Regimen Composition for Drug-Sensitive and Multidrug-Resistant Tuberculosis. *Annu. Rev. Pharmacol. Toxicol.* **61**, 495–516 (2021).
22. Donald, P. R. & Diacon, A. H. The early bactericidal activity of anti-tuberculosis drugs: a literature review. *Tuberculosis* **88 Suppl 1**, S75–83 (2008).
23. Diacon, A. H. *et al.* Phase II dose-ranging trial of the early bactericidal activity of PA-824. *Antimicrob. Agents Chemother.* **56**, 3027–3031 (2012).
24. Boeree, M. J. *et al.* A dose-ranging trial to optimize the dose of rifampin in the treatment of tuberculosis. *Am. J. Respir. Crit. Care Med.* **191**, 1058–1065 (2015).
25. Diacon, A. H. *et al.* Early bactericidal activity of delamanid (OPC-67683) in smear-positive pulmonary tuberculosis patients. *Int. J. Tuberc. Lung Dis.* **15**, 949–954 (2011).
26. Rustomjee, R. *et al.* Early bactericidal activity and pharmacokinetics of the diarylquinoline TMC207 in treatment of pulmonary tuberculosis. *Antimicrob. Agents Chemother.* **52**, 2831–2835 (2008).
27. Diacon, A. H. *et al.* Randomized dose-ranging study of the 14-day early bactericidal activity of bedaquiline (TMC207) in patients with sputum microscopy smear-positive pulmonary tuberculosis. *Antimicrob. Agents Chemother.* **57**, 2199–2203 (2013).
28. Dietze, R. *et al.* Early and extended early bactericidal activity of linezolid in pulmonary tuberculosis. *Am. J. Respir. Crit. Care Med.* **178**, 1180–1185 (2008).

29. Diacon, A. H. *et al.* Bactericidal activity of pyrazinamide and clofazimine alone and in combinations with pretomanid and bedaquiline. *Am. J. Respir. Crit. Care Med.* **191**, 943–953 (2015).
30. Donald, P. R. *et al.* The early bactericidal activity of isoniazid related to its dose size in pulmonary tuberculosis. *Am. J. Respir. Crit. Care Med.* **156**, 895–900 (1997).
31. Gosling, R. D. *et al.* The bactericidal activity of moxifloxacin in patients with pulmonary tuberculosis. *Am. J. Respir. Crit. Care Med.* **168**, 1342–1345 (2003).
32. Johnson, J. L. *et al.* Early and extended early bactericidal activity of levofloxacin, gatifloxacin and moxifloxacin in pulmonary tuberculosis. *Int. J. Tuberc. Lung Dis.* **10**, 605–612 (2006).
33. Pletz, M. W. R. *et al.* Early bactericidal activity of moxifloxacin in treatment of pulmonary tuberculosis: a prospective, randomized study. *Antimicrob. Agents Chemother.* **48**, 780–782 (2004).
34. Sirgel, F. A. *et al.* The early bactericidal activities of rifampin and rifapentine in pulmonary tuberculosis. *Am. J. Respir. Crit. Care Med.* **172**, 128–135 (2005).
35. Diacon, A. H. *et al.* Multidrug-resistant tuberculosis and culture conversion with bedaquiline. *N. Engl. J. Med.* **371**, 723–732 (2014).
36. Committee for Medicinal Products for Human Use (CHMP). *CHMP assessment report SIRTURO*. [https://www.ema.europa.eu/en/documents/variation-report/sirturo-h-c-2614-ii-0033-g-epar-assessment-report\\_en.pdf](https://www.ema.europa.eu/en/documents/variation-report/sirturo-h-c-2614-ii-0033-g-epar-assessment-report_en.pdf) (2019).
37. Shimokawa, Y. *et al.* Metabolic Mechanism of Delamanid, a New Anti-Tuberculosis Drug, in Human Plasma. *Drug Metab. Dispos.* **43**, 1277–1283 (2015).
38. Jayaram, R. *et al.* Isoniazid pharmacokinetics–pharmacodynamics in an aerosol infection model of tuberculosis. *Antimicrob. Agents Chemother.* **48**, 2951–2957 (2004).
39. Woo, J. *et al.* In vitro protein binding characteristics of isoniazid, rifampicin, and pyrazinamide to whole plasma, albumin, and alpha-1-acid glycoprotein. *Clin. Biochem.* **29**, 175–177 (1996).

40. Lepak, A. J., Marchillo, K., Pichereau, S., Craig, W. A. & Andes, D. R. Comparative pharmacodynamics of the new oxazolidinone tedizolid phosphate and linezolid in a neutropenic murine *Staphylococcus aureus* pneumonia model. *Antimicrob. Agents Chemother.* **56**, 5916–5922 (2012).
41. Siefert, H. M. *et al.* Pharmacokinetics of the 8-methoxyquinolone, moxifloxacin: a comparison in humans and other mammalian species. *J. Antimicrob. Chemother.* **43 Suppl B**, 69–76 (1999).
42. Rakesh *et al.* Synthesis and evaluation of pretomanid (PA-824) oxazolidinone hybrids. *Bioorg. Med. Chem. Lett.* **26**, 388–391 (2016).
43. Stada Pharmaceuticals, Inc, Cranbury, NJ, 2004. Product Information: pyrazinamide oral tablets, pyrazinamide oral tablets. Preprint at [https://www.micromedexsolutions.com/micromedex2/librarian/CS/E2AC9E/ND\\_PR/evidencexpert/ND\\_P/evidencexpert/DUPLICATIONSHIELDSYNC/C17097/ND\\_PG/evidencexpert/ND\\_B/evidencexpert/ND\\_AppProduct/evidencexpert/ND\\_T/evidencexpert/PFActionId/evidencexpert.DoIntegratedSearch?SearchTerm=pyrazinamide&UserSearchTerm=pyrazinamide&SearchFilter=filterNone&navitem=searchALL#cite5\\_dp](https://www.micromedexsolutions.com/micromedex2/librarian/CS/E2AC9E/ND_PR/evidencexpert/ND_P/evidencexpert/DUPLICATIONSHIELDSYNC/C17097/ND_PG/evidencexpert/ND_B/evidencexpert/ND_AppProduct/evidencexpert/ND_T/evidencexpert/PFActionId/evidencexpert.DoIntegratedSearch?SearchTerm=pyrazinamide&UserSearchTerm=pyrazinamide&SearchFilter=filterNone&navitem=searchALL#cite5_dp).
44. de Steenwinkel, J. E. M. *et al.* Optimization of the rifampin dosage to improve the therapeutic efficacy in tuberculosis treatment using a murine model. *Am. J. Respir. Crit. Care Med.* **187**, 1127–1134 (2013).
45. sanofi-aventis U.S. (per manufacturer), Bridgewater, NJ, 2014. Product Information: PRIFTIN(R) oral tablets, rifapentine oral tablets. Preprint at [https://www.micromedexsolutions.com/micromedex2/librarian/CS/A32D19/ND\\_PR/evidencexpert/ND\\_P/evidencexpert/DUPLICATIONSHIELDSYNC/0EBD73/ND\\_PG/evidencexpert/ND\\_B/evidencexpert/ND\\_AppProduct/evidencexpert/ND\\_T/evidencexpert/PFActionId/evidencexpert.DoIntegratedSearch?SearchTerm=rifapentine&UserSearchTerm=rifapentine&SearchFilter=filterNone&navitem=searchALL#cite2\\_dp](https://www.micromedexsolutions.com/micromedex2/librarian/CS/A32D19/ND_PR/evidencexpert/ND_P/evidencexpert/DUPLICATIONSHIELDSYNC/0EBD73/ND_PG/evidencexpert/ND_B/evidencexpert/ND_AppProduct/evidencexpert/ND_T/evidencexpert/PFActionId/evidencexpert.DoIntegratedSearch?SearchTerm=rifapentine&UserSearchTerm=rifapentine&SearchFilter=filterNone&navitem=searchALL#cite2_dp).



46. Assandri, A., Ratti, B. & Cristina, T. Pharmacokinetics of rifapentine, a new long lasting rifamycin, in the rat, the mouse and the rabbit. *J. Antibiot.* **37**, 1066–1075 (1984).
